# Supplementary material
Source: publisher figshare collection journal article supplement (https://frontiersin.figshare.com/ndownloader/files/24191921)
Supplement: Supplementary file 1 [file 24191921]

Workshop	Stakeholder	Degree	Gatekeeper/Representative	Liason	Relative Brokerage - Gatekeeper	Relative Brokerage - Liaison	Gatekeeper Reduced	Liaison Reduced	Degree Reduced
1	1	8	0	4	0	1.709	1.543	0	4		Waterman Avg	Aqua Avg	Govt Avg	Sci Avg	Envi Group Avg
1	2	20	1	0	3.877	0	2.571	0.354	8		1.163375	1.182666667	0	1.980333333	0.6796
1	3	11	0	0	0	0	0.771	1.328	7
1	5	12	2	14	0.646	0.997	3.085	0	3
1	6	20	3	0	2.908	0	2.743	0.236	9
1	7	23	3	10	1.292	0.95	1.286	0.885	9
1	8	20	3	8	1.454	0.855	0	0	5
1	9	16	0	0	0	0	1.234	1.275	7
1	10	12	0	36	0	1.398	2.314	0	6
1	11	14	1	4	0.775	0.684	0.771	0	6
1	12	4	0	0	0	0	0	0	2
1	14	50	0	0	0	0	1.449	0.949	20
1	15	23	1	4	1.292	1.139	2.805	0	9
1	16	13	1	2	0.96	0.427	1.851	0.425	6
1	17	24	12	18	1.861	0.615	1.341	1.016	11
1	18	20	27	280	0.529	1.208	0	2.124	9
1	20	15	5	20	1.14	1.005	2.314	0.531	7
1	21	10	0	4	0	1.709	2.057	0.708	5
1	22	4	14	34	1.508	0.807	0	0	4
1	23	13	1	48	0.121	1.282	0	1.859	7
1	25	0	0	14	0	1.329	0	0	0
1	28	0	0	0	0	0	0	0	0
1	29	0	0	0	0	0	0	0	0
1	30	0	0	0	0	0	0	0	0
1	31	0	0	0	0	0	0	0	0
2	1	23	3	12	0.969	0.855	1.371	0	9
2	2	28	12	16	1.789	0.526	3.085	0	9		Waterman Avg	Aqua Avg	Govt Avg	Sci Avg	Envi Group Avg
2	3	41	31	64	1.717	0.781	1.481	0.85	14		1.483625	0.477333333	0.534	2.123166667	1.0532
2	5	28	6	18	1.454	0.961	2.281	0.462	12
2	6	32	4	6	1.551	0.513	2.743	0	10
2	7	34	3	4	1.939	0.57	1.286	1.151	13
2	8	24	23	34	1.939	0.632	0	0	6
2	9	30	0	50	0	1.583	0.771	1.062	11
2	10	28	0	56	0	1.45	0.661	1.366	11
2	11	22	29	44	1.704	0.57	2.16	0	9
2	12	30	0	0	0	0	1.234	0.708	11
2	14	60	15	10	2.005	0.295	1.743	0.787	22
2	15	43	5	20	0.969	0.855	2.083	0.531	15
2	16	42	1	30	0.176	1.165	1.904	0.542	17
2	17	50	8	12	1.939	0.641	1.265	1.08	18
2	18	51	23	204	0.624	1.219	0.441	1.669	19
2	20	23	8	26	1.241	0.889	3.085	0	9
2	21	25	13	24	1.738	0.707	2.204	0.303	10
2	22	27	27	104	1.232	1.046	1.949	0.783	11
2	23	46	0	68	0	1.453	0.475	1.634	17
2	25	34	0	8	0	1.367	0.686	1.573	14
2	28	0	0	0	0	0	0	0	0
2	29	0	0	0	0	0	0	0	0
2	30	0	0	0	0	0	0	0	0
2	31	0	0	0	0	0	0	0	0
3	1	34	7	28	1.131	0.997	1.469	1.113	16		Waterman Avg	Aqua Avg	Govt Avg	Sci Avg	Envi Group Avg
3	2	33	0	0	0	0	2.828	0	12		1.064375	0.769333333	0.543	2.174	0.7408
3	3	56	10	4	2.982	0.263	0.896	1.268	22
3	5	34	0	0	0	0	2.314	0.531	14
3	6	43	0	10	0	1.709	3.085	0	15
3	7	50	14	14	2.36	0.52	0.933	1.136	20
3	8	19	30	66	1.616	0.783	0	0	5
3	9	52	3	106	0.191	1.485	0.802	1.317	21
3	10	49	11	64	0.853	1.094	0.735	1.264	20
3	11	23	33	94	1.438	0.903	1.234	0	10
3	12	47	1	0	3.877	0	0.926	1.062	19
3	14	66	3	24	0.646	1.139	1.89	0.637	23
3	15	40	19	30	1.889	0.657	2.893	0.133	14
3	16	56	18	50	1.424	0.872	1.815	0.583	21
3	17	48	23	14	2.787	0.374	0.949	1.144	20
3	18	53	15	194	0.477	1.359	0.555	1.487	21
3	20	49	26	108	1.172	1.073	2.348	0.231	20
3	21	45	27	66	1.611	0.868	1.683	0.515	19
3	22	28	22	38	1.854	0.706	0	0	12
3	23	50	1	12	0.485	1.282	0.633	1.362	20
3	25	35	10	128	0.491	1.385	0.441	1.821	13
3	28	32	1	6	0.646	0.855	0.771	0.593	11
3	29	0	0	0	0	0	0	0	0
3	30	0	0	0	0	0	0	0	0
3	31	0	0	0	0	0	0	0	0
4	1	16	6	10	1.789	0.657	1.661	0	7		Waterman Avg	Aqua Avg	Govt Avg	Sci Avg	Envi Group Avg
4	2	24	10	18	1.762	0.699	3.085	0	9		1.7535	1.103333333	0.644666667	2.160333333	0.6096
4	3	44	17	84	0.942	1.025	1.234	1.275	13
4	5	0	1	2	1.939	0.855	0	0	0
4	6	30	2	4	1.939	0.855	3.085	0	9
4	7	0	2	12	0.969	1.282	0	0	0
4	8	21	18	36	1.551	0.684	0	0	6
4	9	26	0	0	0	0	1.234	1.275	10
4	10	36	0	138	0	1.421	1.137	1.342	12
4	11	24	0	0	0	0	2.373	0.163	9
4	12	2	2	34	0.352	1.321	0	0	1
4	14	54	2	16	0.775	1.367	1.686	0.864	19
4	15	40	11	42	1.185	0.997	2.792	0.202	13
4	16	52	3	10	1.057	0.777	1.883	0.684	17
4	17	46	33	144	1.105	0.977	0.786	1.541	16
4	18	48	4	14	1.193	0.92	0.63	1.561	16
4	20	30	10	32	1.292	0.912	2.314	0.531	11
4	21	28	29	66	1.606	0.806	2.645	0	8
4	22	17	0	16	0	1.367	2.16	0	7
4	23	32	0	44	0	1.393	0.643	1.682	13
4	25	35	4	2	1.551	0.171	0.661	1.517	11
4	28	39	0	0	0	0	0.939	1.201	12
4	29	8	0	0	0	0	1.543	0	4
4	30	28	0	0	0	0	1.028	1.416	9
4	31	20	0	0	0	0	1.763	0.303	6
5	1	11	24	36	1.825	0.603	3.085	0	5		Waterman Avg	Aqua Avg	Govt Avg	Sci Avg	Envi Group Avg
5	2	40	25	76	1.31	0.878	1.697	0.743	15		1.0595	0.621	0.817333333	1.7015	0.6756
5	3	47	0	14	0	1.329	1.028	1.298	16
5	5	0	1	6	0.969	1.282	0	0	0
5	6	29	22	48	1.58	0.76	2.057	0.531	10
5	7	0	8	30	1.241	1.025	0	0	0
5	8	19	22	58	1.354	0.787	0	0	5
5	9	42	0	0	0	0	1.114	1.239	16
5	10	27	0	82	0	1.322	0.386	1.328	9
5	11	27	1	0	3.877	0	1.851	0.85	10
5	12	2	7	32	0.936	0.943	0	0	1
5	14	56	3	2	2.326	0.342	1.442	0.877	20
5	15	47	8	2	2.82	0.155	1.928	0.69	16
5	16	44	7	16	1.696	0.855	1.277	1.099	15
5	17	35	33	160	0.969	1.036	1.322	1.214	11
5	18	49	2	4	1.939	0.855	0.673	1.39	17
5	20	27	0	2	0	1.709	3.085	0	9
5	21	20	7	20	1.357	0.855	0	1.593	6
5	22	0	1	8	0.646	1.139	0	0	0
5	23	28	0	18	0	1.709	1.028	1.416	9
5	25	47	9	24	1.586	0.932	0.751	1.378	15
5	28	27	0	0	0	0	0.363	1.499	11
5	29	6	0	0	0	0	0	0	3
5	30	28	0	0	0	0	1.028	1.416	9
5	31	25	0	0	0	0	2.263	0	10
6	1	13	14	20	2.01	0.633	2.571	0.354	6		Waterman Avg	Aqua Avg	Govt Avg	Sci Avg	Envi Group Avg
6	2	36	35	84	1.475	0.78	2.094	0.531	13		1.71025	0.594333333	0.494	1.975666667	0.7936
6	3	46	3	20	0.831	1.221	1.299	1.006	16
6	5	0	3	6	1.292	0.57	0	0	0
6	6	29	9	48	0.831	0.977	2.848	0.163	11
6	7	0	6	50	0.684	1.257	0	0	0
6	8	21	27	70	1.434	0.819	0	0	6
6	9	43	2	10	0.969	1.068	0.441	1.618	16
6	10	35	8	54	0.739	1.099	0.771	1.46	12
6	11	25	0	0	0	0	2.468	0.212	10
6	12	22	1	48	0.121	1.282	0.771	1.593	9
6	14	56	8	22	1.477	0.895	1.792	0.754	18
6	15	49	10	18	1.551	0.615	2.035	0.588	17
6	16	39	5	16	1.385	0.977	1.851	0.595	14
6	17	46	27	116	1.047	0.991	0.87	1.471	16
6	18	55	2	6	1.292	0.855	0.571	1.573	18
6	20	24	0	0	0	0	3.085	0	9
6	21	33	28	50	1.723	0.678	2.204	0.202	11
6	22	0	1	8	0.431	0.76	0	0	0
6	23	40	0	18	0	1.282	0.47	1.57	16
6	25	32	9	36	1.126	0.992	0.441	1.72	12
6	28	34	0	0	0	0	0.571	1.652	13
6	29	12	0	0	0	0	2.204	0	6
6	30	25	0	0	0	0	1.028	0.708	8
6	31	27	0	0	0	0	2.384	0.193	11
7	1	13	12	24	1.662	0.732	1.028	0	6		Waterman Avg	Aqua Avg	Govt Avg	Sci Avg	Envi Group Avg
7	2	44	27	102	1.163	0.969	1.881	0.622	16		1.495625	1.518666667	0.427333333	1.764	0.5676
7	3	28	2	20	0.456	1.005	0.771	1.593	11
7	5	0	7	34	0.969	1.038	0	0	0
7	6	25	25	60	1.469	0.777	3.085	0	9
7	7	0	10	58	0.902	1.153	0	0	0
7	8	19	2	30	0.408	1.349	0	0	5
7	9	39	0	0	0	0	0.41	1.629	15
7	10	16	0	36	0	1.619	3.085	0	5
7	11	27	0	0	0	0	1.424	0.817	11
7	12	14	9	48	0.872	1.025	0	0	5
7	14	61	13	18	1.939	0.592	1.452	0.916	21
7	15	48	0	0	0	0	2.03	0.727	16
7	16	32	3	2	2.326	0.342	2.314	0.354	12
7	17	40	32	184	0.862	1.092	0.987	1.359	14
7	18	54	1	4	1.292	1.139	0.692	1.392	18
7	20	32	8	22	1.551	0.94	2.136	0.654	11
7	21	31	18	42	1.517	0.78	1.91	0.303	12
7	22	0	1	12	0.554	1.465	0	0	0
7	23	19	0	32	0	1.439	0	0	7
7	25	48	3	6	1.939	0.855	0.59	1.468	18
7	28	38	0	0	0	0	1.061	1.195	14
7	29	24	0	0	0	0	2.204	0.303	11
7	30	39	0	0	0	0	1.08	1.275	14
7	31	19	0	0	0	0	3.085	0	7
8	1
8	2
8	3
8	5
8	6
8	7
8	8
8	9
8	10
8	11
8	12
8	14
8	15
8	16
8	17
8	18
8	20
8	21
8	22
8	23
8	25
8	28
8	29
8	30
8	31
9	1	15	3	14	1.163	1.196	3.085	0	5		Waterman Avg	Aqua Avg	Govt Avg	Sci Avg	Envi Group Avg
9	2	52	25	76	1.227	0.822	2.4	0.354	15		1.7065	0.493666667	0.425333333	2.3525	0.6736
9	3	60	7	22	1.234	0.855	0.857	1.416	17
9	5	0	1	16	0.352	1.243	0	0	0
9	6	37	2	32	0.369	1.302	3.085	0	11
9	7	0	14	42	1.292	0.855	0	0	0
9	8	38	23	48	1.462	0.672	3.085	0	10
9	9	64	0	0	0	0	0.359	1.778	18
9	10	16	0	90	0	1.398	0	2.124	5
9	11	48	0	8	0	1.709	1.543	0.929	14
9	12	6	10	16	1.686	0.594	0	0	2
9	14	65	12	26	1.789	0.855	1.657	0.787	18
9	15	62	1	0	3.877	0	2.345	0.425	16
9	16	60	0	8	0	1.709	1.87	0.708	17
9	17	64	18	76	1.108	1.031	1.483	0.94	18
9	18	65	0	2	0	1.709	0.633	1.525	17
9	20	31	0	2	0	1.709	1.543	0	8
9	21	39	25	80	1.292	0.912	2.017	0.408	13
9	22	0	0	4	0	1.709	0	0	0
9	23	36	0	2	0	0.57	0	2.124	11
9	25	63	5	18	1.292	1.025	0.643	1.549	18
9	28	52	0	0	0	0	1.122	1.129	14
9	29	51	0	0	0	0	2.492	0.082	15
9	30	36	0	0	0	0	1.028	1.416	9
9	31	30	0	0	0	0	2.645	0	9
